# Supplementary material
Source: ML conference proceedings conference paper supplement (https://openreview.net/forum?id=o0oroLuPLZ)
Supplement: supplementary_material [file attachment]

In order to reproduce the results of this paper, readers can access the source code in the anonymous Github repository via this link: <https://anonymous.4open.science/r/Sp-R-IP-55D2>. This repository includes the data and scripts used for training the forecasters, as well as scripts for reproducing the figures.
